# Supplementary material for: Ultra-stiff and tough hydrogels based on small but strong hydrophobic associations via a low-reactive hydrophilic monomer
Source: Royal Society of Chemistry journal article supplement (doi:10.1039/d3py00191a), 2023-01-01
Supplement: d3py00191a4.pdf [file d3py00191a4.pdf]

Supporting Information

## **Ultra-stiff and tough hydrogels based on small but strong hydrophobic associations *via* low-reactive hydrophilic monomer**

Lei Yang,<sup>a,b,c</sup> Shuo Li,<sup>a,b,c</sup> Zijian Zhao,<sup>a,b,c</sup> Jie Wang,<sup>c,d</sup> Hongying Lv<sup>\*a,c</sup> and Xiaoni  
Yang<sup>\*a,b,c</sup>

<sup>a</sup> State Key Laboratory of Polymer Physics and Chemistry, Changchun Institute of Applied Chemistry, Chinese Academy of Sciences, 5625 Renmin Street, Changchun 130022, P. R. China

<sup>b</sup> School of Applied Chemistry and Engineering, University of Science and Technology of China, Jinzhai Road No 96, Hefei 230026, P. R. China

<sup>c</sup> CAS Key Laboratory of High-Performance Synthetic Rubber and its Composite Materials, Changchun Institute of Applied Chemistry, Chinese Academy of Sciences, 5625 Renmin Street, Changchun 130022, P. R. China

<sup>d</sup> Huangpu Institute of Materials, Changchun Institute of Applied Chemistry, Chinese Academy of Sciences, Lianyun Road No 388, Guangzhou 510530, China

\*Corresponding Authors. E-mail: hongyinglv@ciac.ac.cn (H.Y. Lv); E-mail: xnyang@ciac.ac.cn (X.N. Yang)

The conversions of monomers (IMA and AAm) during the radical copolymerization could be calculated by an established method.<sup>1</sup> As an illustration, the conversion of IMA at any AAm conversion during copolymerization with a ratio of monomers as  $[IMA]_0/[AAm]_0 = 0.77/0.39$  were calculated step-by-step.

1. Assuming that the vinyl group in IMA has the same reactivity as that of ethyl methacrylate (EMA), the Q and e values of IMA are equal to that of EMA. Both EMA and AAm (Q, e) values are cited from Polymer Handbook,<sup>2</sup> and reactivity ratios were calculated on the basis of Alfrey-Price equations, as follows :

$$r_{IMA} = \frac{Q_{IMA}}{Q_{AAm}} \exp\left[\frac{e_{AAm}}{2} - e_{IMA}(e_{IMA} - e_{AAm})\right]$$

$$r_{AAm} = \frac{Q_{AAm}}{Q_{IMA}} \exp\left[\frac{e_{IMA}}{2} - e_{AAm}(e_{AAm} - e_{IMA})\right]$$

2. Based on the equations shown below, the variation of the molar fraction of unreacted IMA in the feed ( $f_{IMA}$ ) as a function of total conversion ( $Conv_{total}$ ) was calculated.

$$Conv_{total} = 1 - \frac{M}{M_0} = 1 - \left(\frac{f_{IMA}}{f_{IMA}^0}\right)^\alpha \left(\frac{f_{AAm}}{f_{AAm}^0}\right)^\beta \left(\frac{f_{IMA}^0 - \delta}{f_{IMA} - \delta}\right)^\gamma$$

$$\alpha = \frac{r_{AAm}}{1 - r_{AAm}} \quad \beta = \frac{r_{IMA}}{1 - r_{IMA}} \quad \gamma = \frac{1 - r_{IMA}r_{AAm}}{(1 - r_{IMA})(1 - r_{AAm})} \quad \delta = \frac{1 - r_{AAm}}{2 - r_{IMA} - r_{AAm}}$$

where, the molar fraction of IMA in the initial monomer feed is  $f_{IMA}^0 = 1/(1+0.5) = 0.667$ , and the molar fraction of AAm in the initial monomer feed is  $f_{AAm}^0 = 0.5/(1+0.5) = 0.333$ .

3. Knowing the variation of  $f_{IMA}$  and  $f_{AAm} = 1 - f_{IMA}$  as a function of  $Conv_{total}$ , the conversions of IMA ( $Conv_{IMA}$ ) and AAm ( $Conv_{AAm}$ ) at any moment were calculated:

$$Conv_{IMA} = 1 - \frac{f_{IMA}(1 - Conv_{total})}{f_{IMA}^0}$$

$$Conv_{AAm} = 1 - \frac{f_{AAm}(1 - Conv_{total})}{f_{AAm}^0}$$

**Water content measurement.** The water content of the all hydrogels were calculated as water content (wt%)= $[(W_s - W_d)/W_s] \times 100\%$ , where  $W_s$  is the weight of the water-equilibrated hydrogel and  $W_d$  is the weight of the hydrogels that were dried in a lyophilizer.

**The swelling ratio measurement.** The swelling ratio of P(IMA<sub>1</sub>-co-AAm<sub>1</sub>) hydrogel ( $S_w$ ) under water was determined as  $S_w = W_t/W_0$ , in which  $W_t$  and  $W_0$  were the weight at different immersing time and the initial one, respectively.

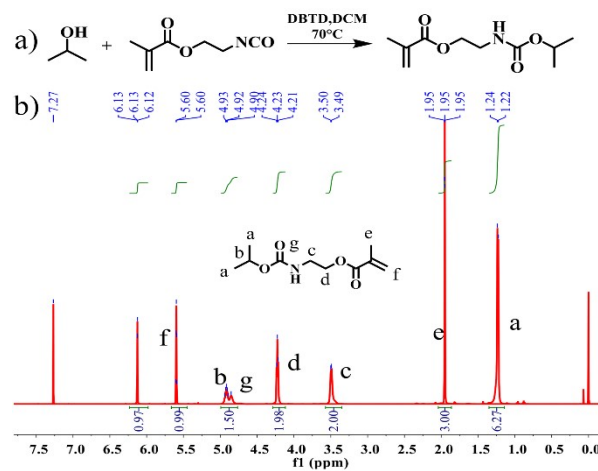

Fig. S1. (a) Synthetic route and (b) <sup>1</sup>H NMR spectrum of IMA.

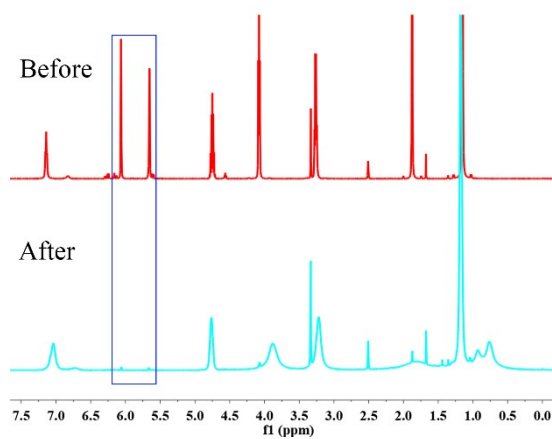

Fig. S2. <sup>1</sup>H NMR spectra of IMA before and after polymerization.

Table S1. Q, e values and the reactivity ratios of IMA and AAm.

|     | Q value | e value | Reactivity ratio |
|-----|---------|---------|------------------|
| IMA | 0.76    | 0.17    | 3.52             |
| AAm | 0.23    | 0.54    | 0.25             |

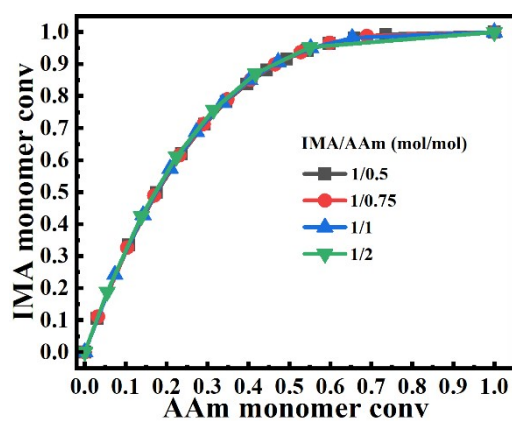

Fig. S3. Calculated results for IMA conversion versus the AAm conversion during the copolymerization of them.

Table S2. Preparation conditions of P(IMA<sub>1</sub>-co-AAm<sub>y</sub>)-m-n hydrogels.

| <b>Code</b>                                   | <b>IMA<br/>(mol/L)</b> | <b>AAm<br/>(mol/L)</b> | <b>MBAA<br/>(mol/L)</b> |
|-----------------------------------------------|------------------------|------------------------|-------------------------|
| PIMA                                          | 0.89                   | 0                      |                         |
| P(IMA <sub>1</sub> -co-AAm <sub>0.5</sub> )   | 0.77                   | 0.39                   |                         |
| P(IMA <sub>1</sub> -co-AAm <sub>0.75</sub> )  | 0.72                   | 0.54                   | 0.025                   |
| P(IMA <sub>1</sub> -co-AAm <sub>1</sub> )     | 0.67                   | 0.68                   |                         |
| P(IMA <sub>1</sub> -co-AAm <sub>2</sub> )     | 0.54                   | 1.08                   |                         |
| P(IMA-co-AAm)-0.5%                            |                        |                        | 0.006                   |
| P(IMA-co-AAm)-1%                              | 0.072                  | 0.054                  | 0.012                   |
| P(IMA-co-AAm)-3%                              |                        |                        | 0.036                   |
| P(IMA-co-AAm)-4%                              |                        |                        | 0.049                   |
| P(IMA-co-AAm)-9%                              | 0.40                   | 0.30                   | 0.014                   |
| P(IMA <sub>4</sub> -co-AAm <sub>3</sub> )-19% | 0.92                   | 0.69                   | 0.032                   |
| P(IMA <sub>4</sub> -co-AAm <sub>3</sub> )-24% | 1.21                   | 0.91                   | 0.042                   |

AIBN was used as initiator for all hydrogels with a concentration of 0.3 mol% with respect to the total monomer concentration.

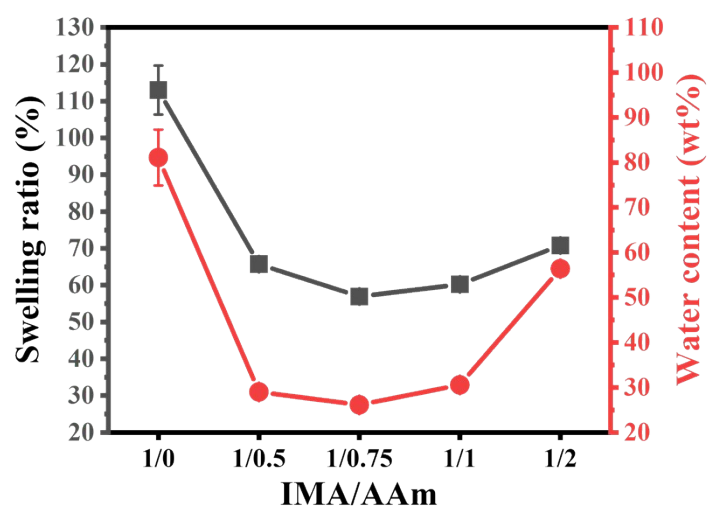

Fig. S4. The swelling ratios and water content of P(IMA-co-AAm) hydrogels with different IMA/AAm molar ratios.

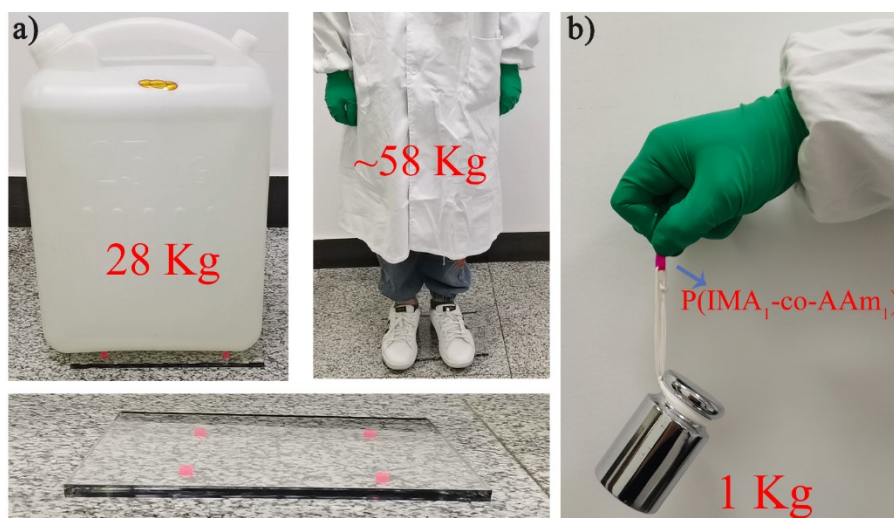

Fig. S5. Photos of P(IMA<sub>1</sub>-co-AAm<sub>1</sub>) hydrogel (a) supports 28 kg of water or a person with weight of 58 kg without collapse, (b) lifts a weight of 1 kg without stretching.

Table S3. Tensile and compressive properties of different hydrogels.

| Samples                                      | Tensile               |                       |                                |                     |                    | Compressive                     |                           |                                | Water content (wt%) |
|----------------------------------------------|-----------------------|-----------------------|--------------------------------|---------------------|--------------------|---------------------------------|---------------------------|--------------------------------|---------------------|
|                                              | Breaking stress (MPa) | Young's modulus (MPa) | Toughness (MJ/m <sup>3</sup> ) | Breaking strain (%) | Yield stress (MPa) | Stress at 85% compression (MPa) | Compressive modulus (MPa) | Toughness (MJ/m <sup>3</sup> ) |                     |
| P(IMA <sub>1</sub> -co-AAm <sub>0.5</sub> )  | 5.45±0.46             | 57.53±7.94            | 0.97±0.07                      | 31.67±3.21          | -                  | 232.45±16.06                    | 200.94±32.35              | 25.95±2.82                     | 29.0±1.2            |
| P(IMA <sub>1</sub> -co-AAm <sub>0.75</sub> ) | 4.48±0.22             | 48.39±3.89            | 19.80±0.30                     | 466±19.30           | 3.95±0.12          | 140.39±9.89                     | 57.57±1.32                | 16.83±0.78                     | 26.7±0.2            |
| P(IMA <sub>1</sub> -co-AAm <sub>1</sub> )    | 3.30±0.17             | 29.43±1.27            | 9.07±1.60                      | 445±14.11           | 1.56±0.06          | 98.13±5.97                      | 28.60±2.78                | 8.93±0.49                      | 30.6±0.7            |
| P(IMA <sub>1</sub> -co-AAm <sub>2</sub> )    | 0.64±0.09             | 0.60±0.06             | 1.61±0.44                      | 399.5±20.8          | -                  | 10.52±1.50                      | 0.33±0.03                 | 0.90±0.07                      | 56.4±0.3            |
| P(IMA-co-AAm)-0.5%                           | 1.63±0.07             | 47.14±3.37            | 0.74±0.05                      | 38.67±5.13          | -                  | 64.07±6.80                      | 26.82±1.35                | 7.55±0.56                      | 44.3±2.3            |
| P(IMA-co-AAm)-1%                             | 3.05±0.11             | 43.03±1.25            | 5.00±0.37                      | 192.67±21.73        | 3.65±0.17          | 109.18±11.39                    | 46.56±8.93                | 12.71±0.78                     | 36.3±1.5            |
| P(IMA-co-AAm)-3%                             | 4.26±0.07             | 56.64±5.69            | 17.18±0.76                     | 458±12.58           | 3.75±0.12          | 166.86±4.31                     | 76.02±8.01                | 18.69±0.85                     | 26.0±0.3            |
| P(IMA-co-AAm)-4%                             | 4.04±0.07             | 54.40±3.08            | 13.50±1.07                     | 396±31              | 3.63±0.11          | 193.16±14.71                    | 106.5±7.61                | 24.53±5.27                     | 25.3±1.5            |
| P(IMA-co-AAm)-9%                             | 2.68±0.21             | 43.21±2.13            | 0.83±0.06                      | 34.33±2.08          | -                  | 66.67±9.67                      | 40.72±0.71                | 8.66±0.81                      | 41.4±0.6            |
| P(IMA-co-AAm)-19%                            | 4.92±0.06             | 49.09±1.68            | 19.32±0.15                     | 459.33±18.50        | 3.46±0.27          | 179.66±19.26                    | 59.72±1.93                | 18.45±0.28                     | 26.0±0.8            |
| P(IMA-co-AAm)-24%                            | 4.87±0.07             | 40.89±2.38            | 18.80±0.26                     | 459.67±9.07         | 3.37±0.15          | 144.55±10.10                    | 33.41±6.29                | 14.69±0.73                     | 25.9±0.2            |
| Human cartilage <sup>3-6</sup>               | 8.1-40                | 58-228                | -                              | 80                  | -                  | 14-59                           | 8.1-20.1                  | -                              | 60-80               |



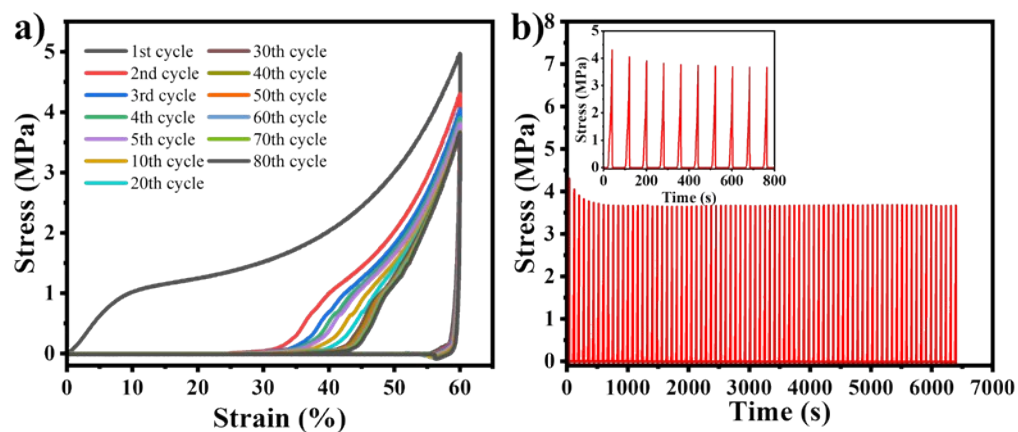

Fig. S6. (a) 80 successive compressive stress-strain curves and (b) stress-time cycles of P(IMA<sub>1</sub>-co-AAm<sub>1</sub>) with 60% strain. The inset was the first 10 compressive stress-time cycles.

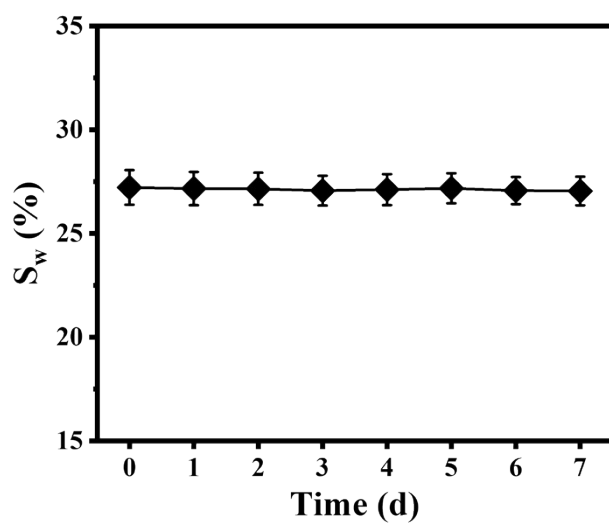

Fig. S7. The swelling ratios of P(IMA<sub>1</sub>-co-AAm<sub>1</sub>) hydrogel at different soaking times.

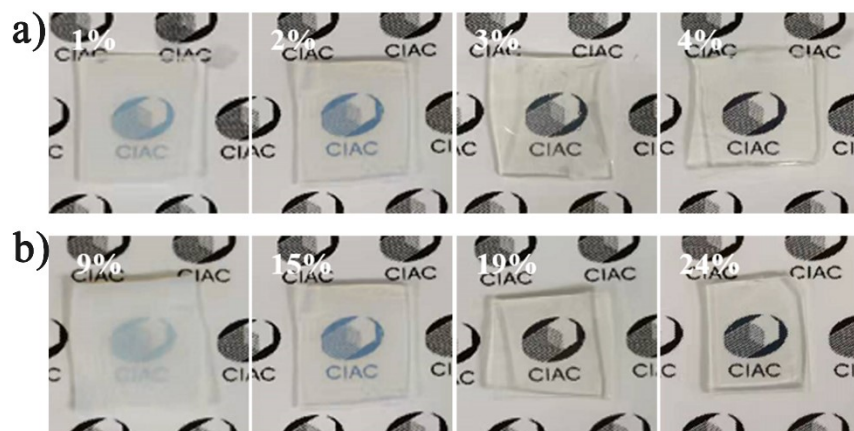

Fig. S8. Photos of P(IMA-co-AAm)-m-n hydrogels with different concentrations of (a) MBAA and (b) monomers.

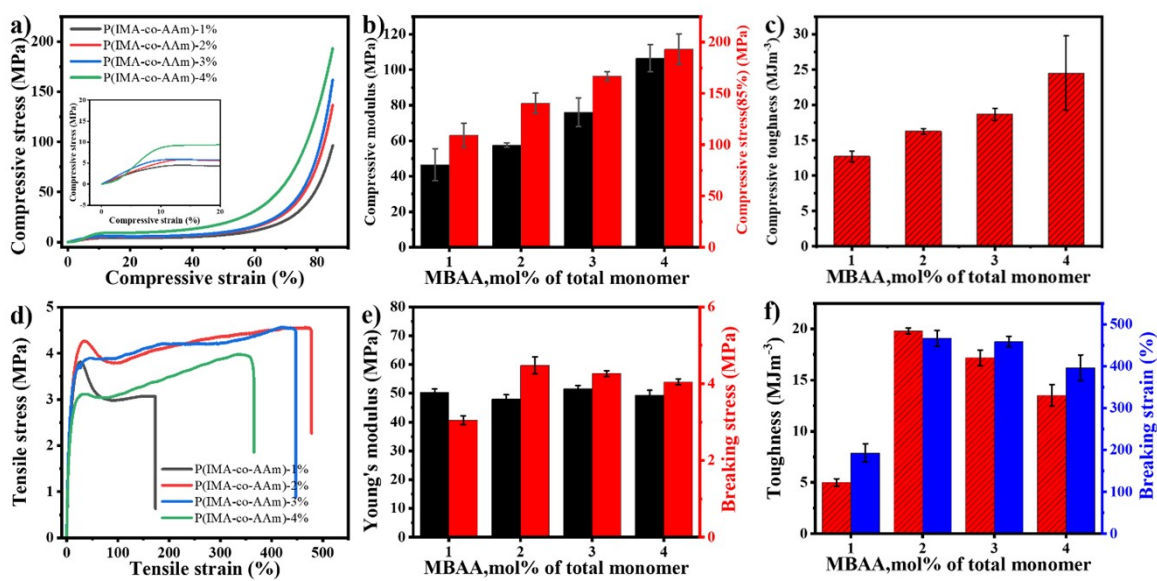

Fig. S9. (a) Compressive and (d) tensile stress–strain curves, (b) compressive modulus and stress at 85%, and (c) compressive toughness, (e) Young’s modulus and breaking stress, (f) toughness and breaking strain of different MBAA (mol%/monomers) hydrogels.

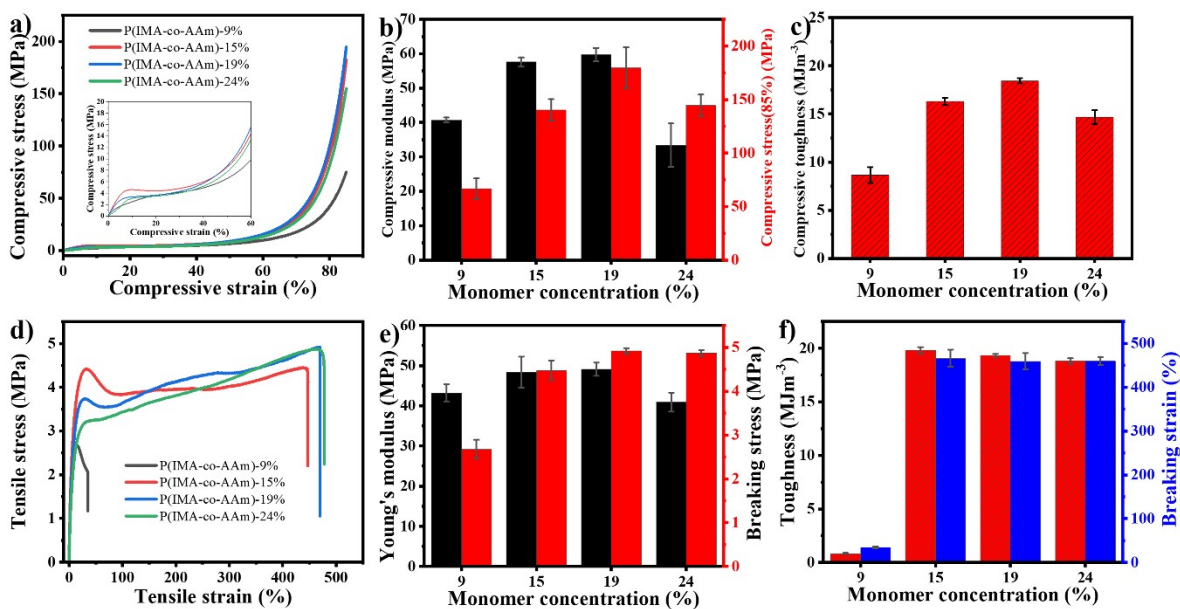

Fig. S10. (a) Compressive and (d) tensile stress–strain curves, (b) compressive modulus and stress at 85%, and (c) compressive toughness, (e) Young’s modulus and breaking stress, (f) toughness and breaking strain of different monomer concentration hydrogels.

Table S4. Preparation conditions of other hydrogels.

| Code          | IMA<br>(mol/L) | AAm<br>(mol/L) | MBAA<br>(mol/L) |
|---------------|----------------|----------------|-----------------|
| P(IAA-co-AAm) | 0.84           | 0.63           | 0.029           |
| P(BMA-co-AAm) | 1.02           | 0.77           | 0.036           |

AIBN was used as initiator for all hydrogels with a concentration of 0.3 mol% with respect to the total monomer concentration.

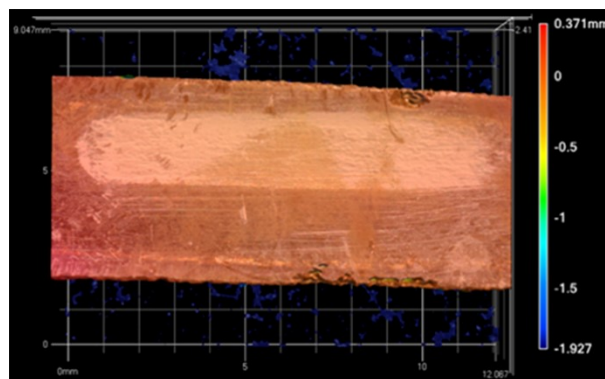

Fig. S11. 3D images of worn surfaces of the P(IMA<sub>1</sub>-co-AAm<sub>1</sub>) hydrogels under PBS solution lubrication.

## References

(1)Gao, H.; Miasnikova, A.; Matyjaszewski, K., Effect of Cross-Linker Reactivity on Experimental Gel Points during ATRcP of Monomer and Cross-Linker. *Macromolecules* 2008, **41**, 7843-7849.

(2) Greenley, R. Z. In *Polymer Handbook*, 3rd ed.; Immergut, E. H., Brandup, J., Eds.; Wiley: New York, 1989; pp 267–274.

(3)Kerin, A. J.; Wisnom, M. R.; Adams, M. A., The compressive strength of articular cartilage. *Proc. Inst. Mech. Eng. Part H J. Mech. Eng. in Med.* 1998, **212**, 273-280.

(4)Kempson, G. E., Age-related changes in the tensile properties of human articular cartilage: a comparative study between the femoral head of the hip joint and the talus of the ankle joint. *BBA Gen. Subj.* 1991, **1075**, 223-230.

(5)Kempson, G. E., Relationship between the tensile properties of articular cartilage from the human knee and age. *Ann. Rheum. Dis.* 1982, **41**, 508.

(6)Kashirina, A.; Yao, Y.; Liu, Y.; Leng, J., Biopolymers as bone substitutes: a review.  
*Biomater. Sci.* 2019, **7**, 3961-3983.
